# Supplementary material
Source: PubMed Central journal article supplement (PMC2529106)
Supplement: 0802719105_0802719105SI.pdf [file 0802719105_0802719105SI.pdf]

# Supporting Information

Jochum *et al.* 10.1073/pnas.0802719105

SI Text

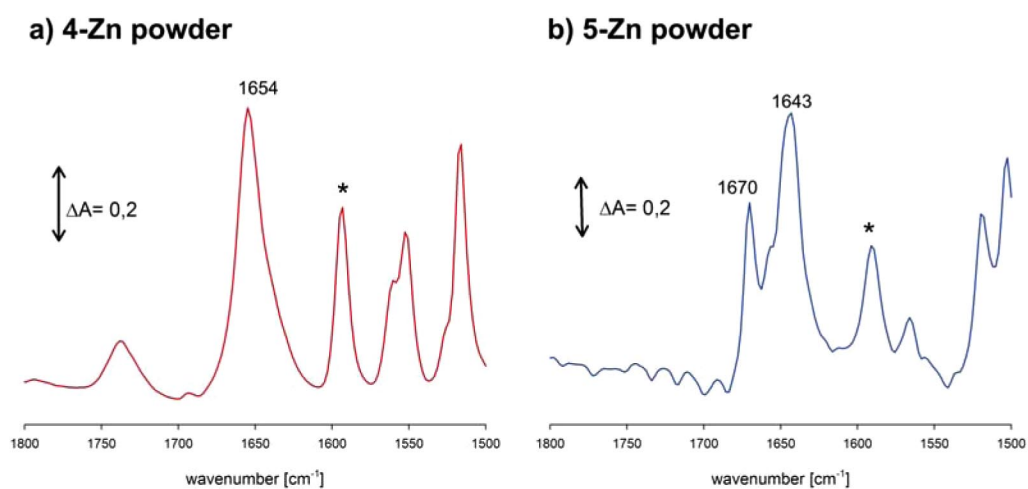

Fig. S1. FT-IR spectra of powder samples recorded under the FT-IR microscope.

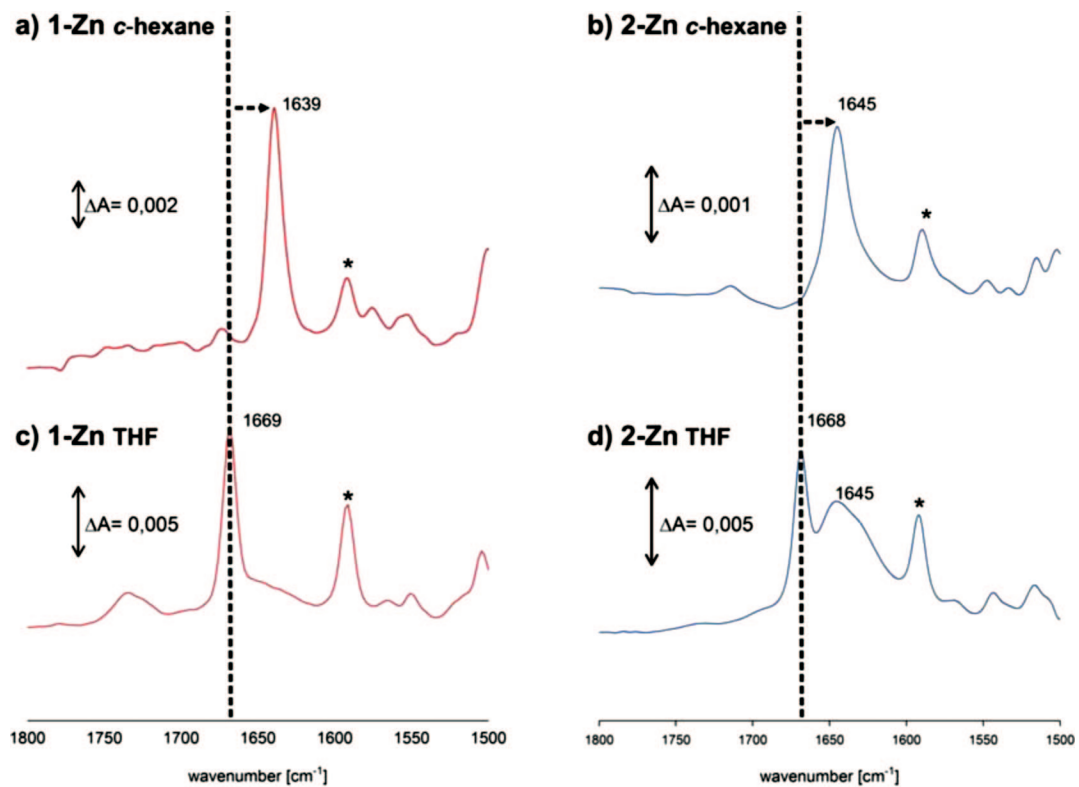

Fig. S2. FT-IR spectra in solution: in cyclohexane (a and b) and in tetrahydrofuran (c and d).

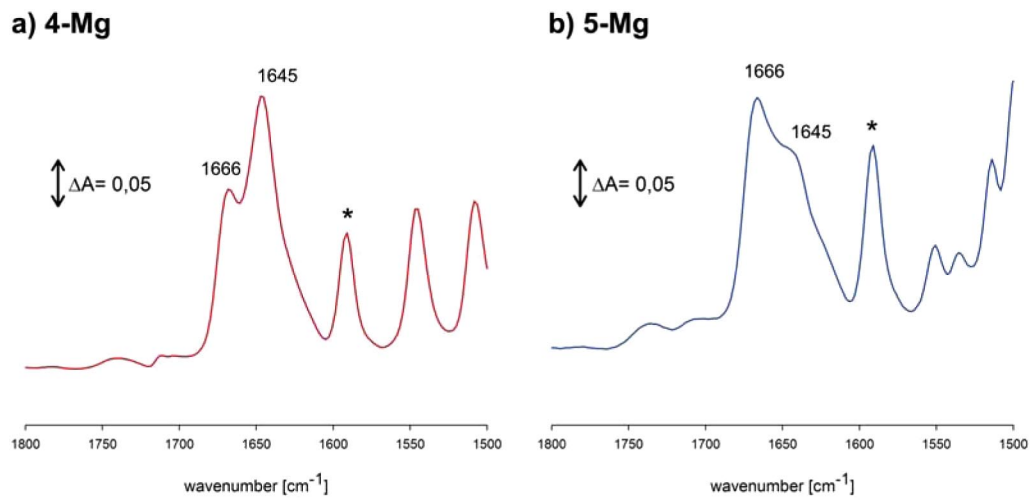

Fig. S3. FT-IR spectra as KBr pellets of magnesium BChl mimics. Note the increased monomer contribution at  $1,666 \text{ cm}^{-1}$ . Asterisks denote the porphyrinic marker band.
